# Supplementary material for: STAT3 And PD-L1 Are Negatively Regulated By ATM And Impact On The Prognosis Of Triple Negative Breast Cancer Patients With Low ATM Expression
Source: Research Square preprint supplement (doi:10.21203/rs.3.rs-1345095/v1), 2022-02-15
Supplement: Supplementary file 1 [file b558fa6c74184265a7997693.docx]

**Table S1. Antibody sources and work concentration.**

| **Antibody** | **Product #** | **Category** | **Clone #** | **Dilution** | **Source** |
| --- | --- | --- | --- | --- | --- |
| PD-1 | ab52587 | Mouse monoclonal | NAT105 | 1:50 | Abcam, USA |
| PD-L1 | ab228462 | Rabbit monoclonal | SP142 | 1:400 | Abcam, USA |
| ATM | ab32420 | Rabbit monoclonal | Y170 | 1:100 | Abcam, USA |
| FOXP3  CD8  STAT1  STAT3  c-src(phospho Y419) | ab191416  ab101500  ab109320  ab68153  ab4816 | Rabbit monoclonal  Rabbit monoclonal  Rabbit monoclonal  Rabbit monoclonal  Rabbit polyclonal | EPR15038-69  SP16  EPR4407  EPR787Y  - | 1:250  1:100  1:250  1:200  1:100 | Abcam, USA  Abcam, USA  Abcam, USA  Abcam, USA  Abcam, USA |
